# Supplementary material for: PHEMTO: protein pH-dependent electric moment tools
Source: PubMed Central journal article supplement — Nucleic Acids Res. 2009 May 6;37(Web Server issue):W422–7. doi: 10.1093/nar/gkp336 (PMC2703894; doi:10.1093/nar/gkp336), 2009-05-06

# Electric Moments GALLERY (Some representative from our EM-Data Base)

\*) See below comments to some of models (marked by PDB-ID)

Major Birch Pollen  
Allergen BET V 1  
(NMR structures)

**1BTV**

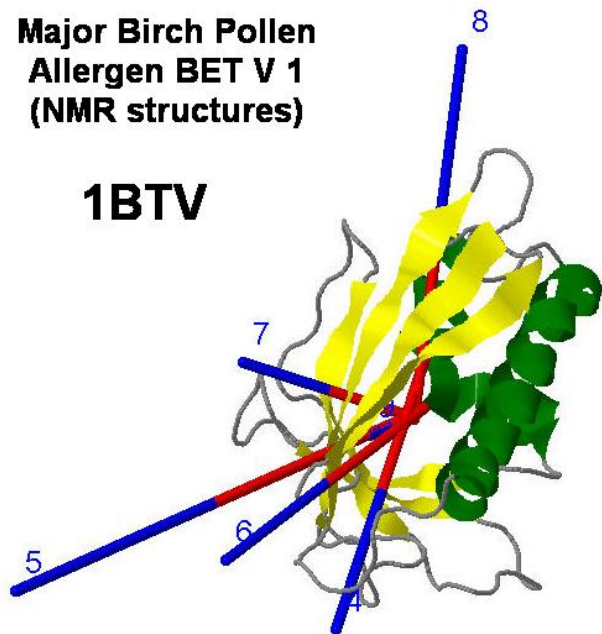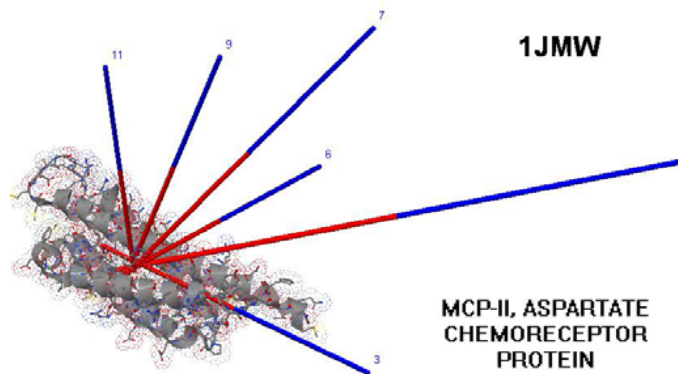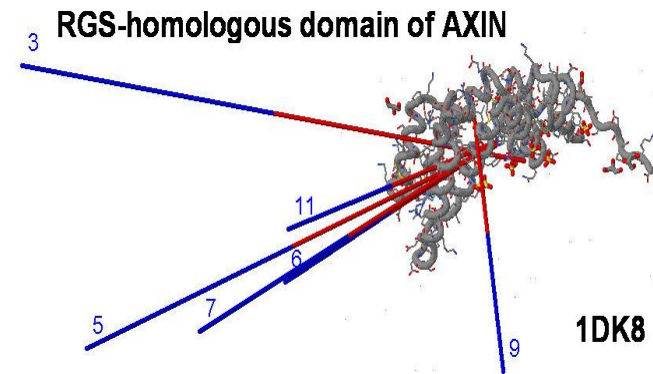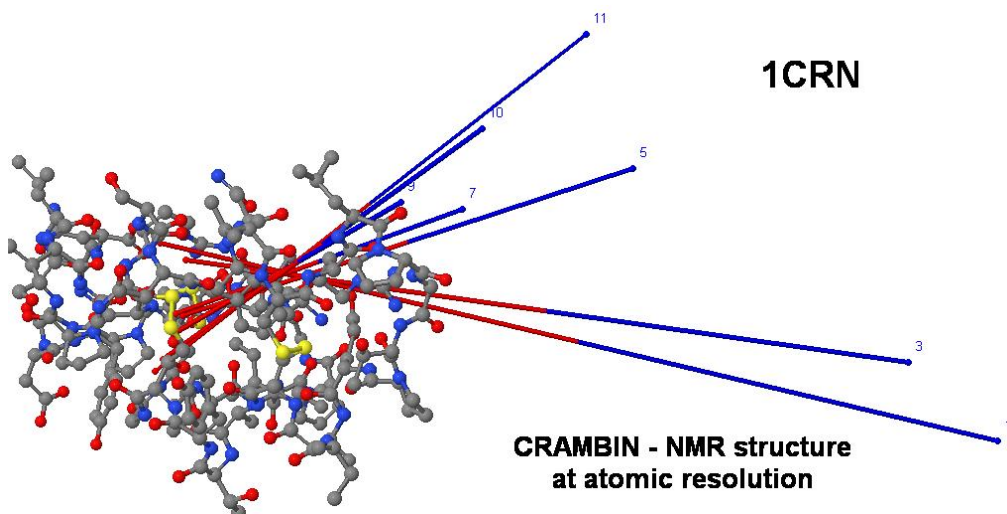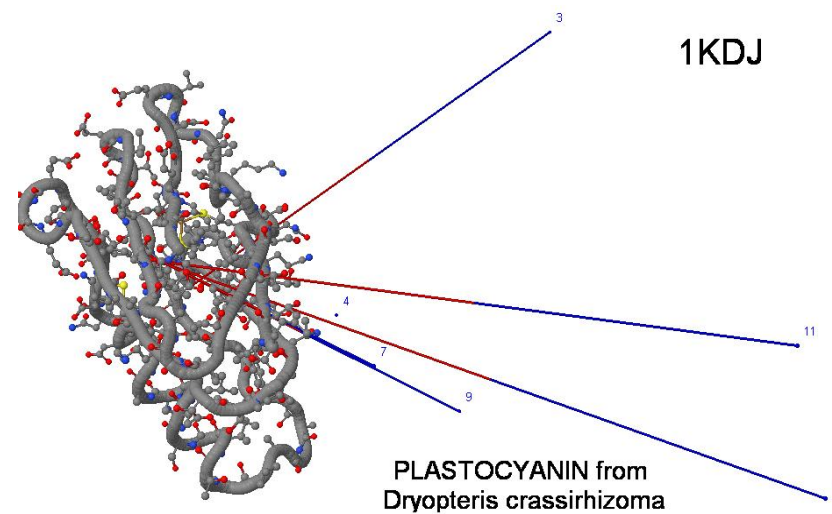

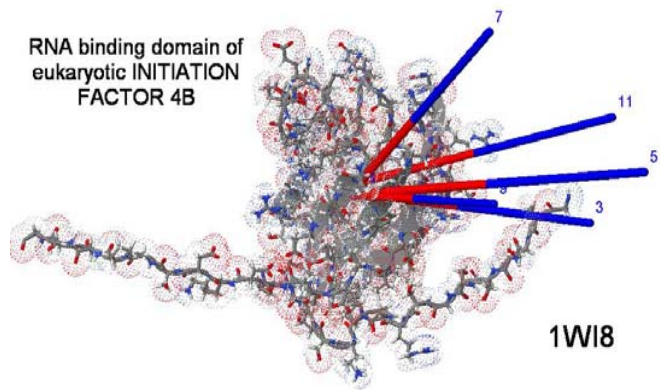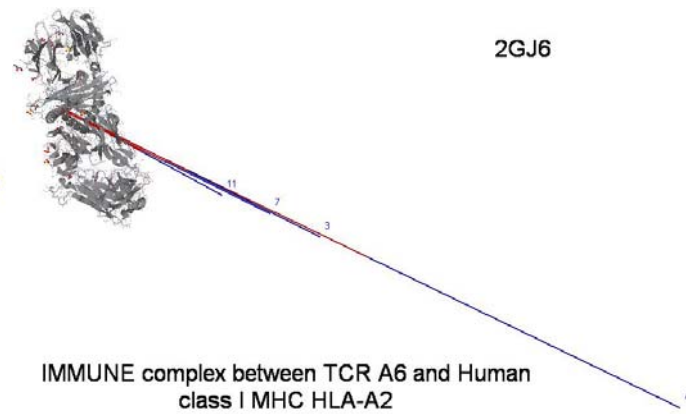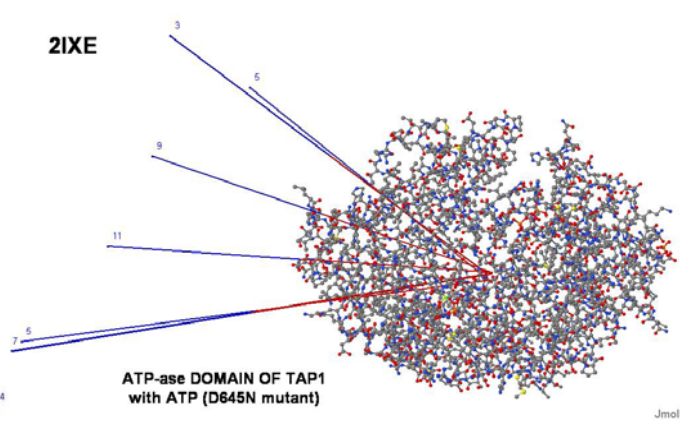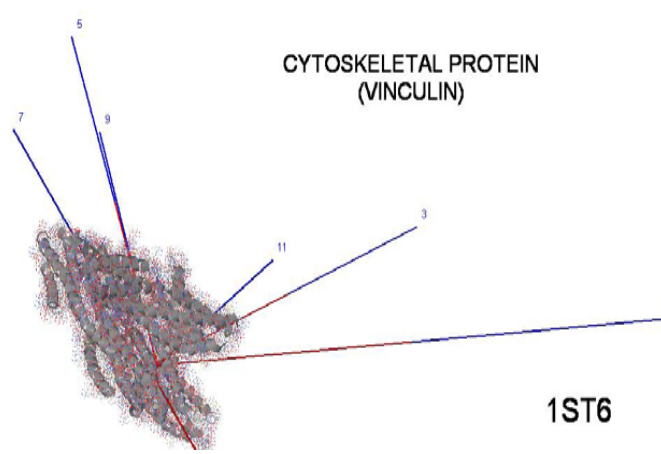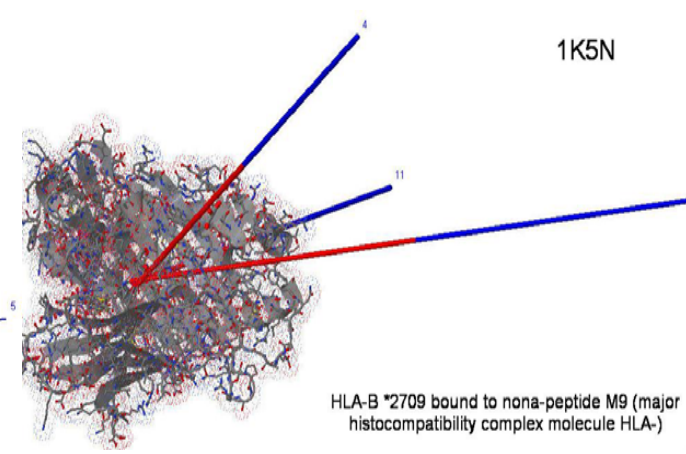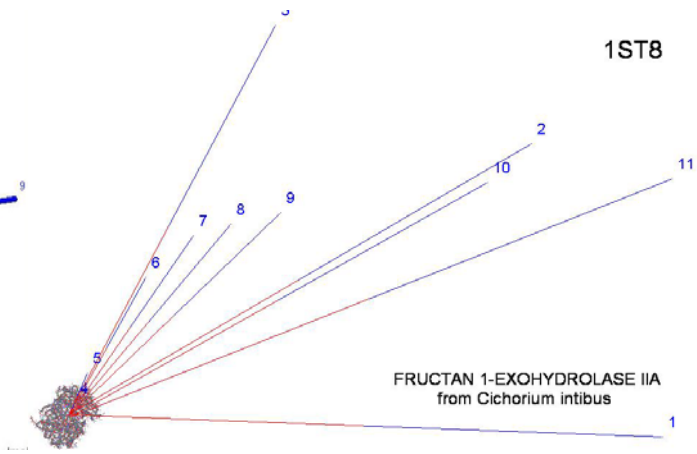

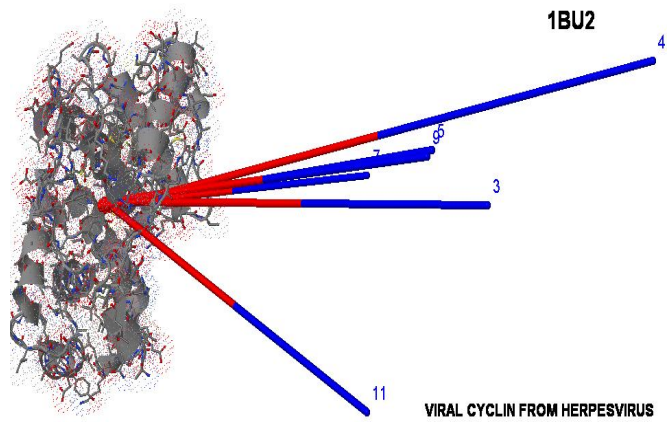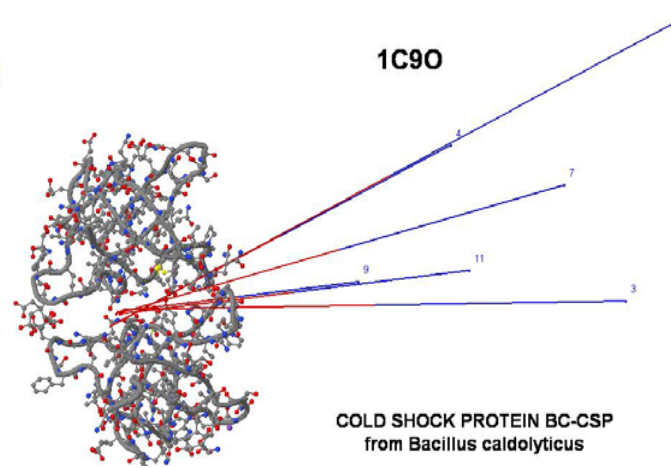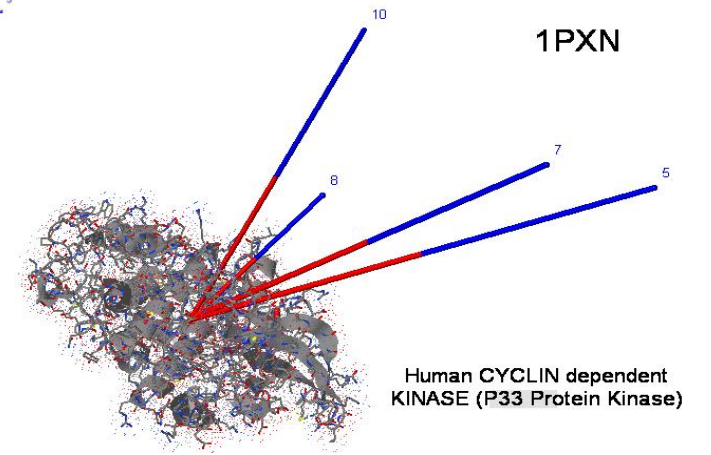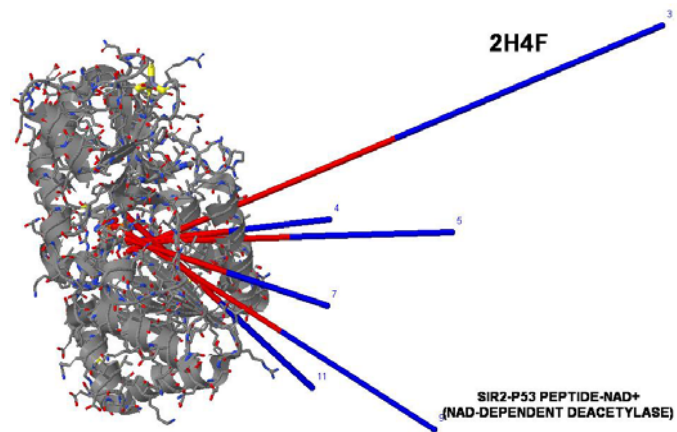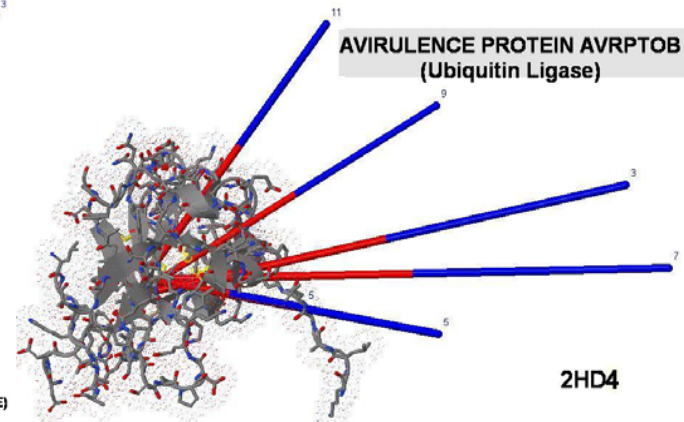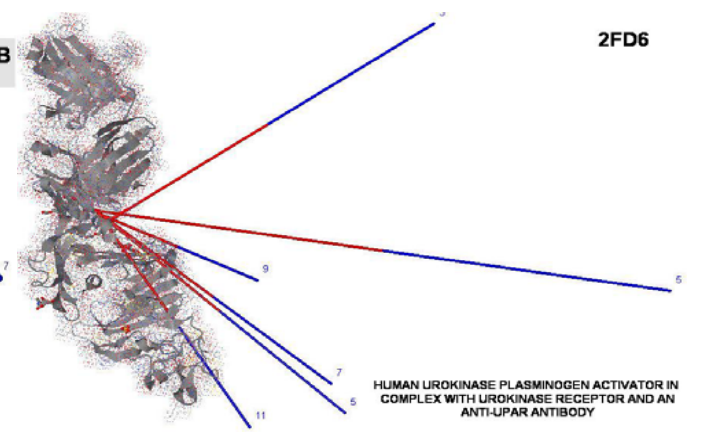



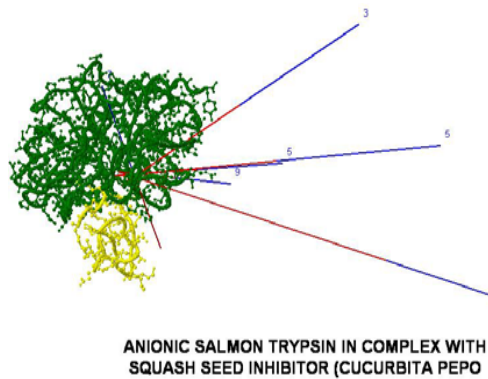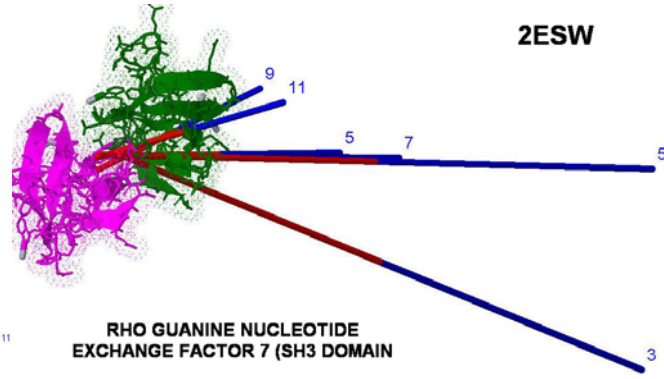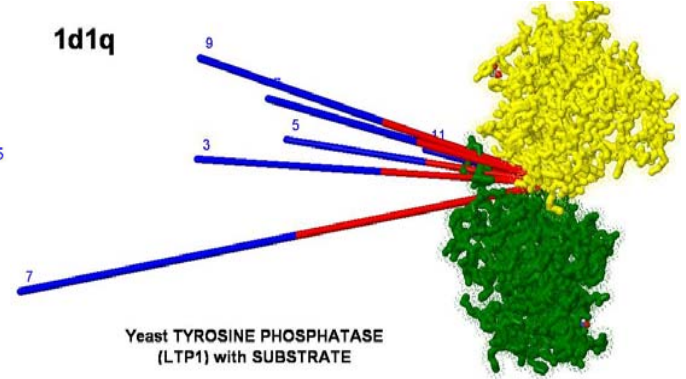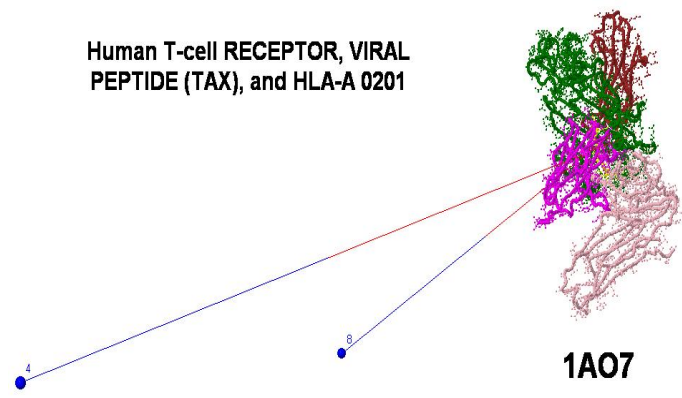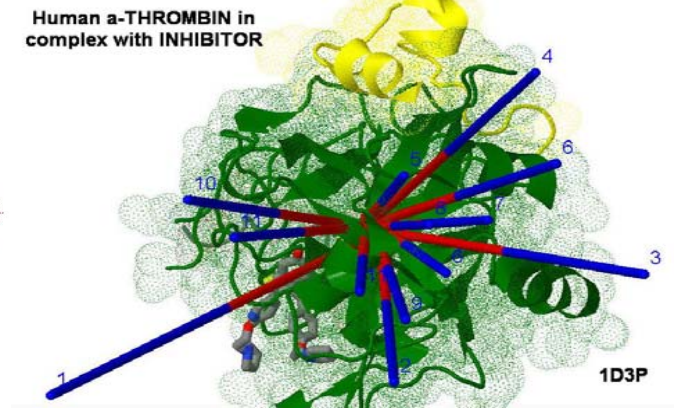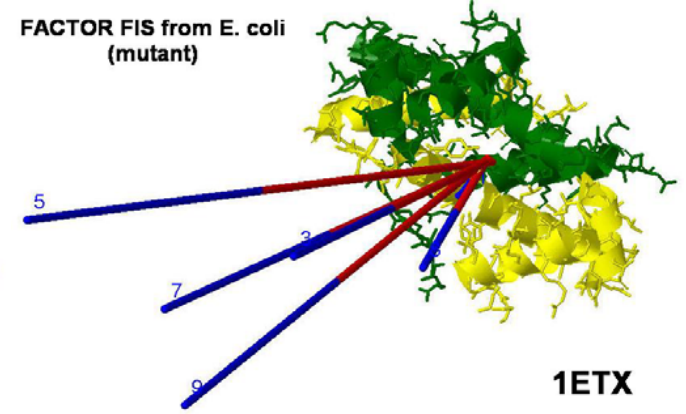

## Human GALECTIN-1 (Lectin)

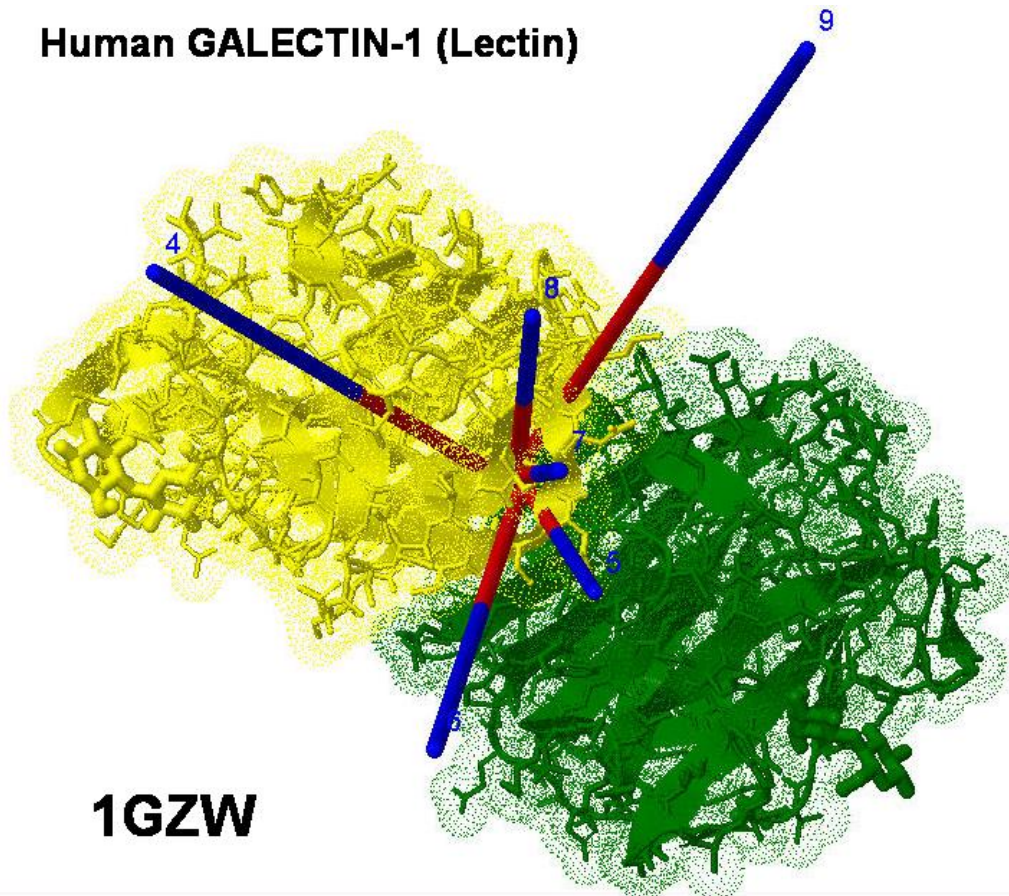

Some comments (from top to down):

NB: All proteins are in APO-forms without removing of prosthetic groups and ions (i.e. extra charges) .

General: All moments start from the charge “center of gravity”. Vectors are directed from negative to positive side of the moments. Numbers at positive ends correspond to pH at which calculation is done (usually at step 2 pH units). For most cases at pH 4-10 vectors lays in same plane and at pH of acid/alkaline denaturation the vector origins are changed. The dipole vectors (at pH=pl) was omitted to not miss order of others.

**1CRN** – For small and hydrophobic proteins (like crambin) each electric moment has own origin, because small number of titrable groups.

**2GJ7** – In HLA-A2 complex all vectors are bring together but not overlapped.

**1ST8** - Fructan Exo-Hydrolase has enormous large vectors (in comparison with many others proteins). Relative lengths are kept in same ratio.

**1AO7** – In case of large complexes calculation of 3D-EPF derived moments can be very time consuming process. Here are shown only two vectors (at pH 4 and 8) witch consume 30 hours on our PHEMTO server.



## pH DEPENDENT ELECTRIC MOMENTS (scalars) of CYTOCHROME REDUCTASE

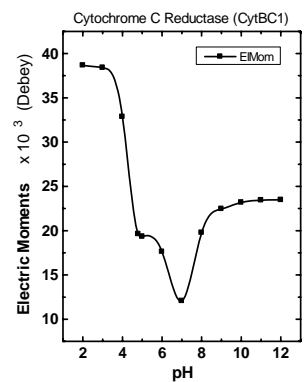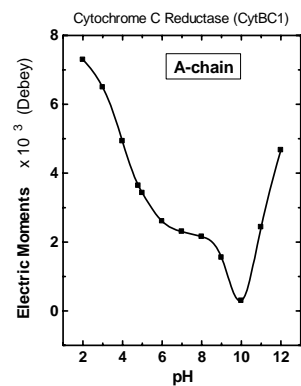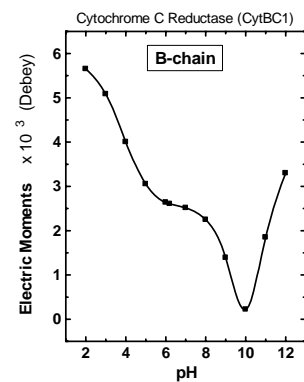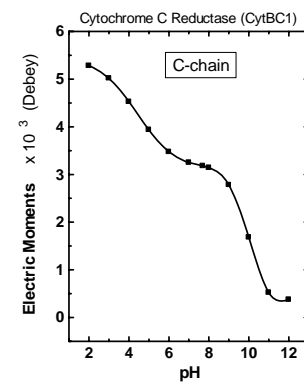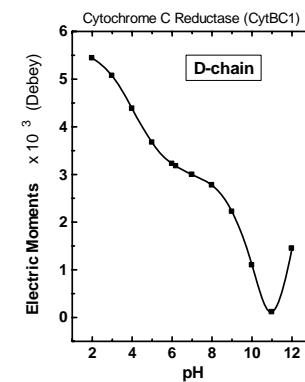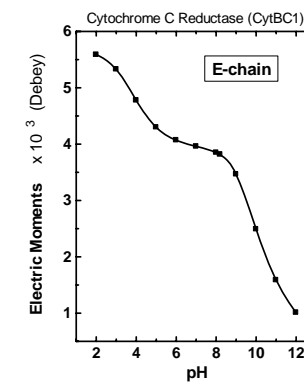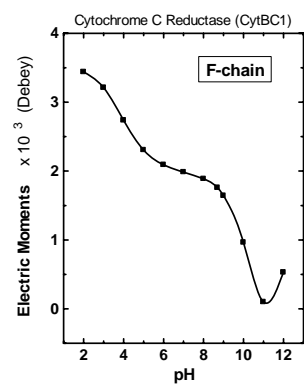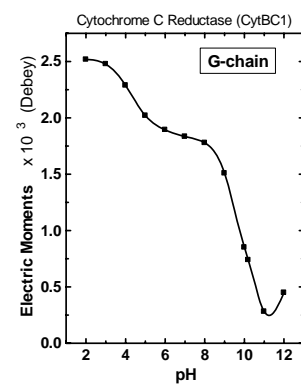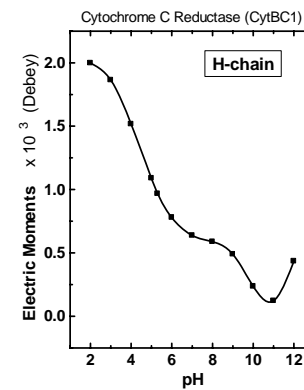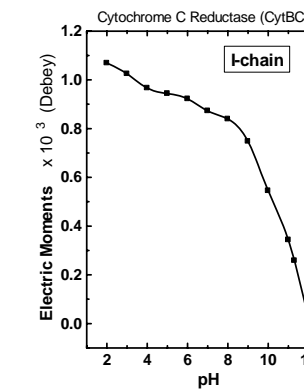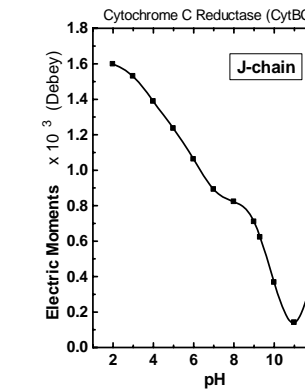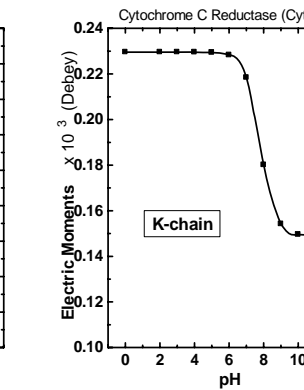

Supplement: gkp336_2.pdf [file gkp336_2.pdf]
