# Supplementary material for: PHEMTO: protein pH-dependent electric moment tools
Source: PubMed Central journal article supplement — Nucleic Acids Res. 2009 May 6;37(Web Server issue):W422–7. doi: 10.1093/nar/gkp336 (PMC2703894; doi:10.1093/nar/gkp336), 2009-05-06
Supplement: gkp336_1.pdf [file gkp336_1.pdf]

Fig. S1-1

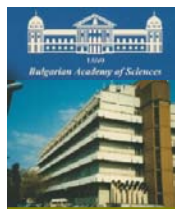

PHEMTO  
PHEMTO

Protein pH-dependent Electric Moments TOols

Institute of Organic Chemistry, Bulgarian Academy of Sciences, Biophysical Chemistry of Proteins Group

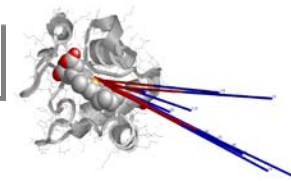

If you have need for electrostatic calculations  
on your protein - use Internet address:

<http://phemto.orgchm.bas.bg/>

The only what you have to have are the atomic coordinates of your protein in PDB format. Than wide variety of pH-dependent properties you can predict :

**PHEMTO** functionality

- $\mu$ (pH) - electric or dipole moments – visualized vectors with preselected length
- $\mu$ (pH) - electric or dipole moments – visualized scalars in wide pH region (2-12)
- Mut(pH) – predefined set of electrostatic mutants (D,E,H,C,Y,K,R → any)
- Difference analysis – subtract any basic pH-function from their derivatives
- F (pH) - electric forces (field gradients) – scalars and vectors */in development/*
- Any function of molecular domain/subunit within all others parts */in development/*

**PHEPS** functionality (automatic link)

- $Z(\text{pH})$  – proton bonding (potentiometric titration) curve; •  $s_i(\text{pH})$  – degree of ionization of each  $i$ -th ionisable site;
- $\Delta G_{\text{el}}(\text{pH}), \Delta G_{\text{tot}}(\text{pH})$  – electrostatic and total free energy (stability), •  $E_{\text{el},i}(\text{pH})$  – Coulomb energy of each ionic group with whole charge multipole, •  $\Phi_j$  – Electrostatic potential at you selected pH on every  $j$ -th atom in your protein;
- $\varphi_i(\text{pH})$  – Electrostatic potential at each  $i$ -th point within or close to molecule; •  $\langle \text{SA} \rangle_1$  - Averaged relative Static Atomic accessibility to the solvent; •  $\langle \text{SR} \rangle_j$  - Averaged relative Static Residue accessibility to the solvent;

and many others

See the NEXT →

# SUPPLEMENT - 1

**Fig. S1-2**

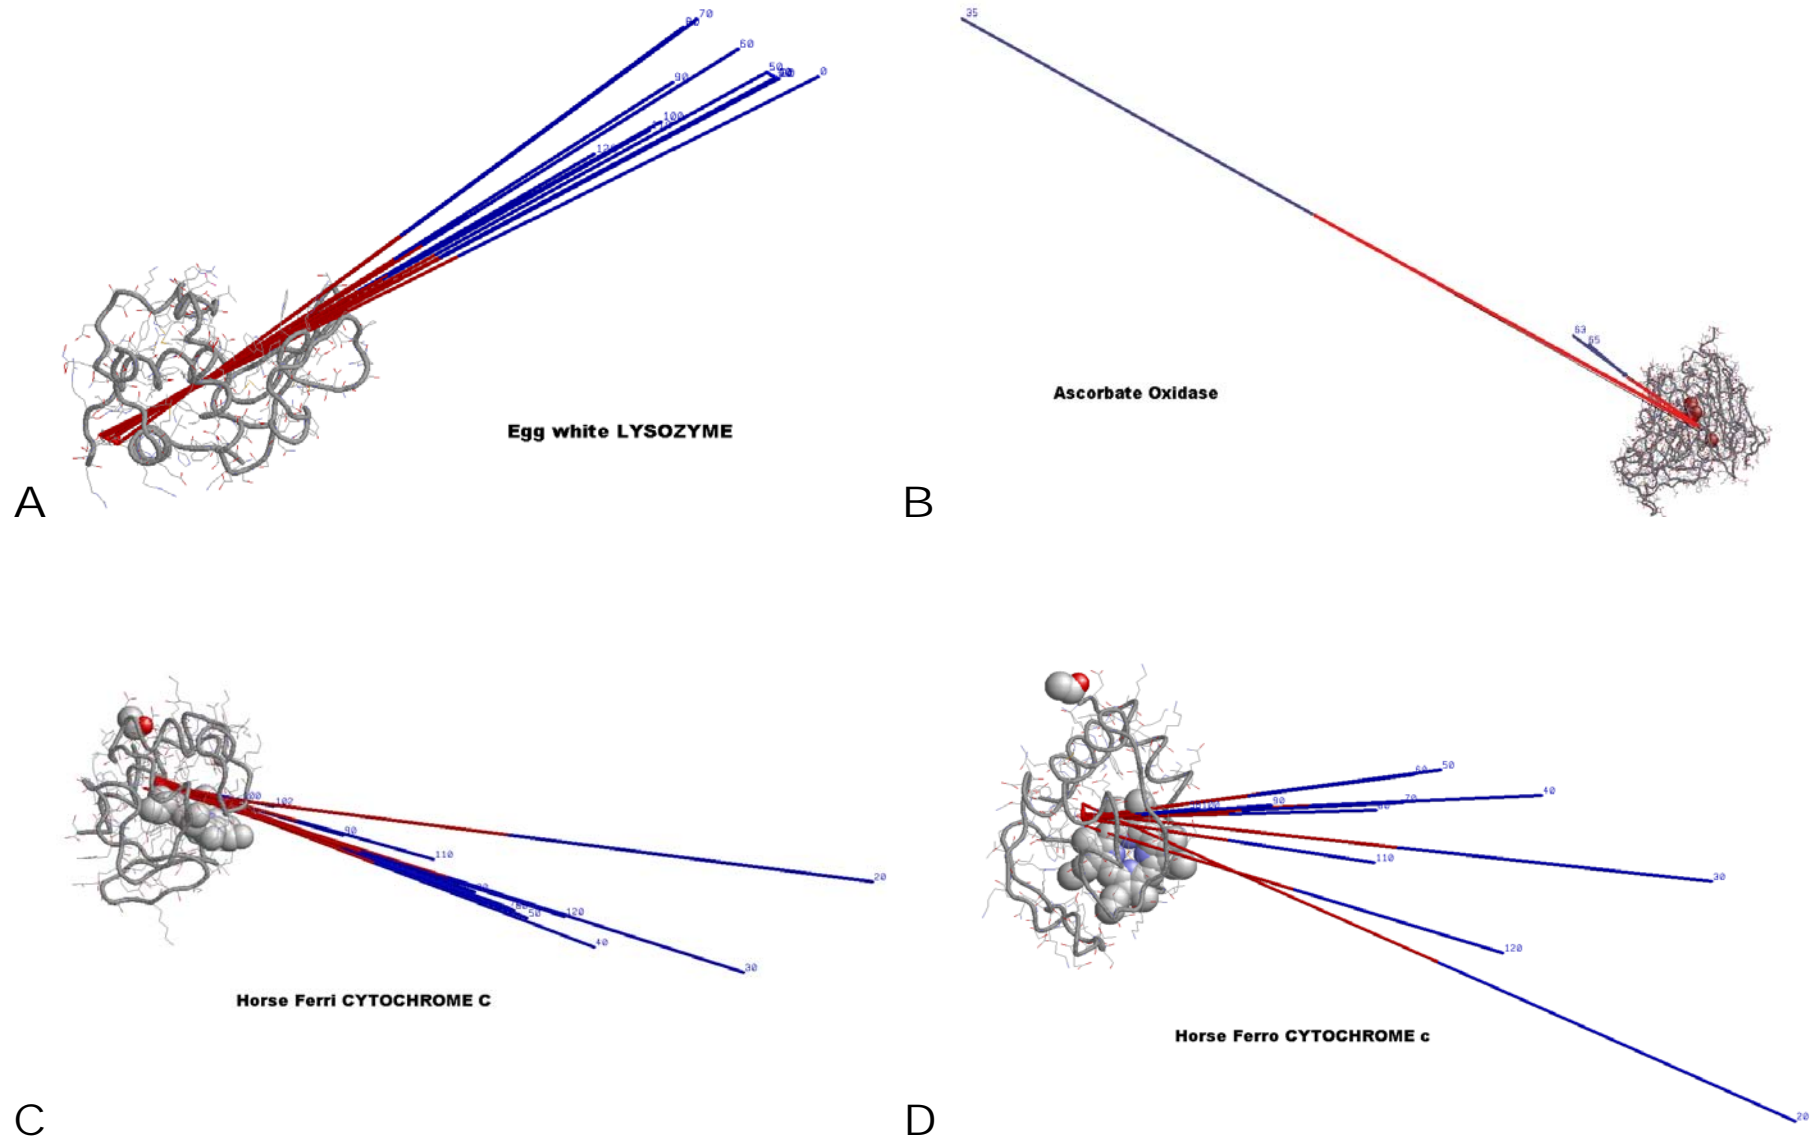

Fig. S1-3

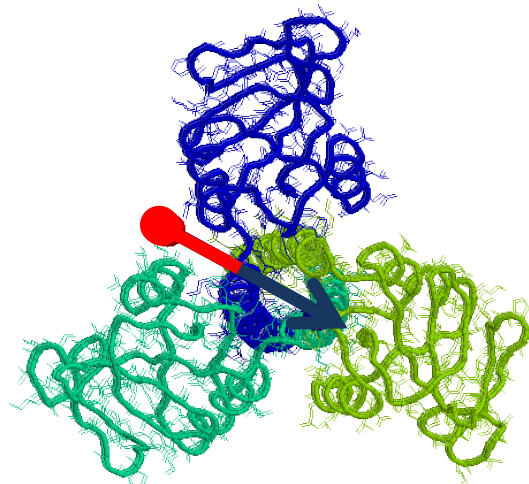

A

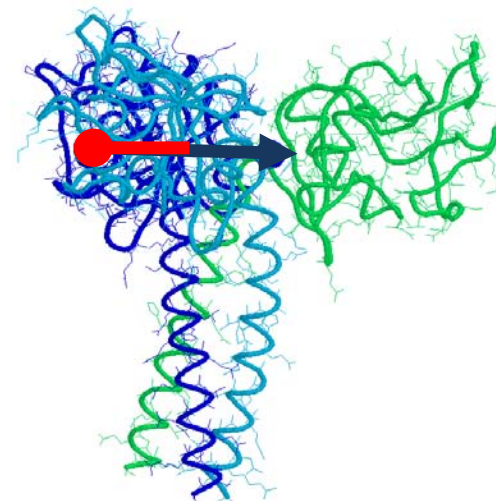

B

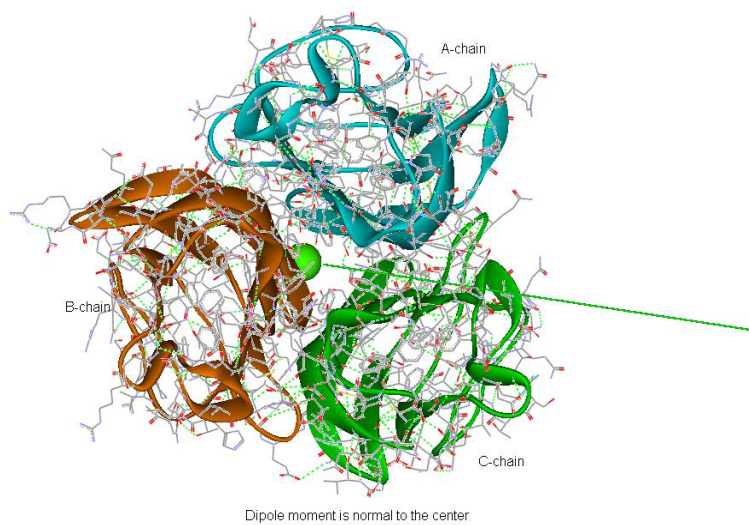

C

Dipole moment is normal to the center

Direction of electric moments in APO and HOLO forms of the B2S-ghC1q complex

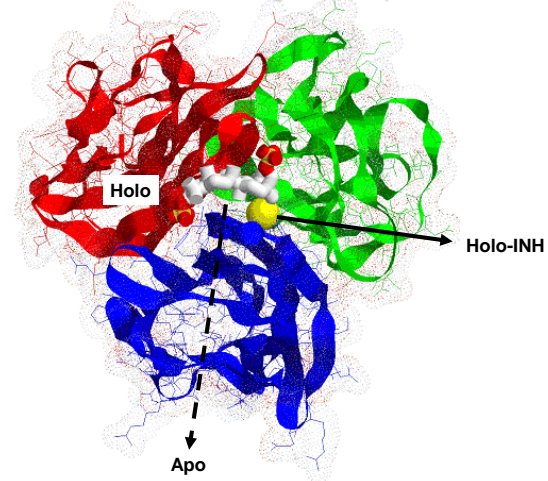

D

Fig. S1-4

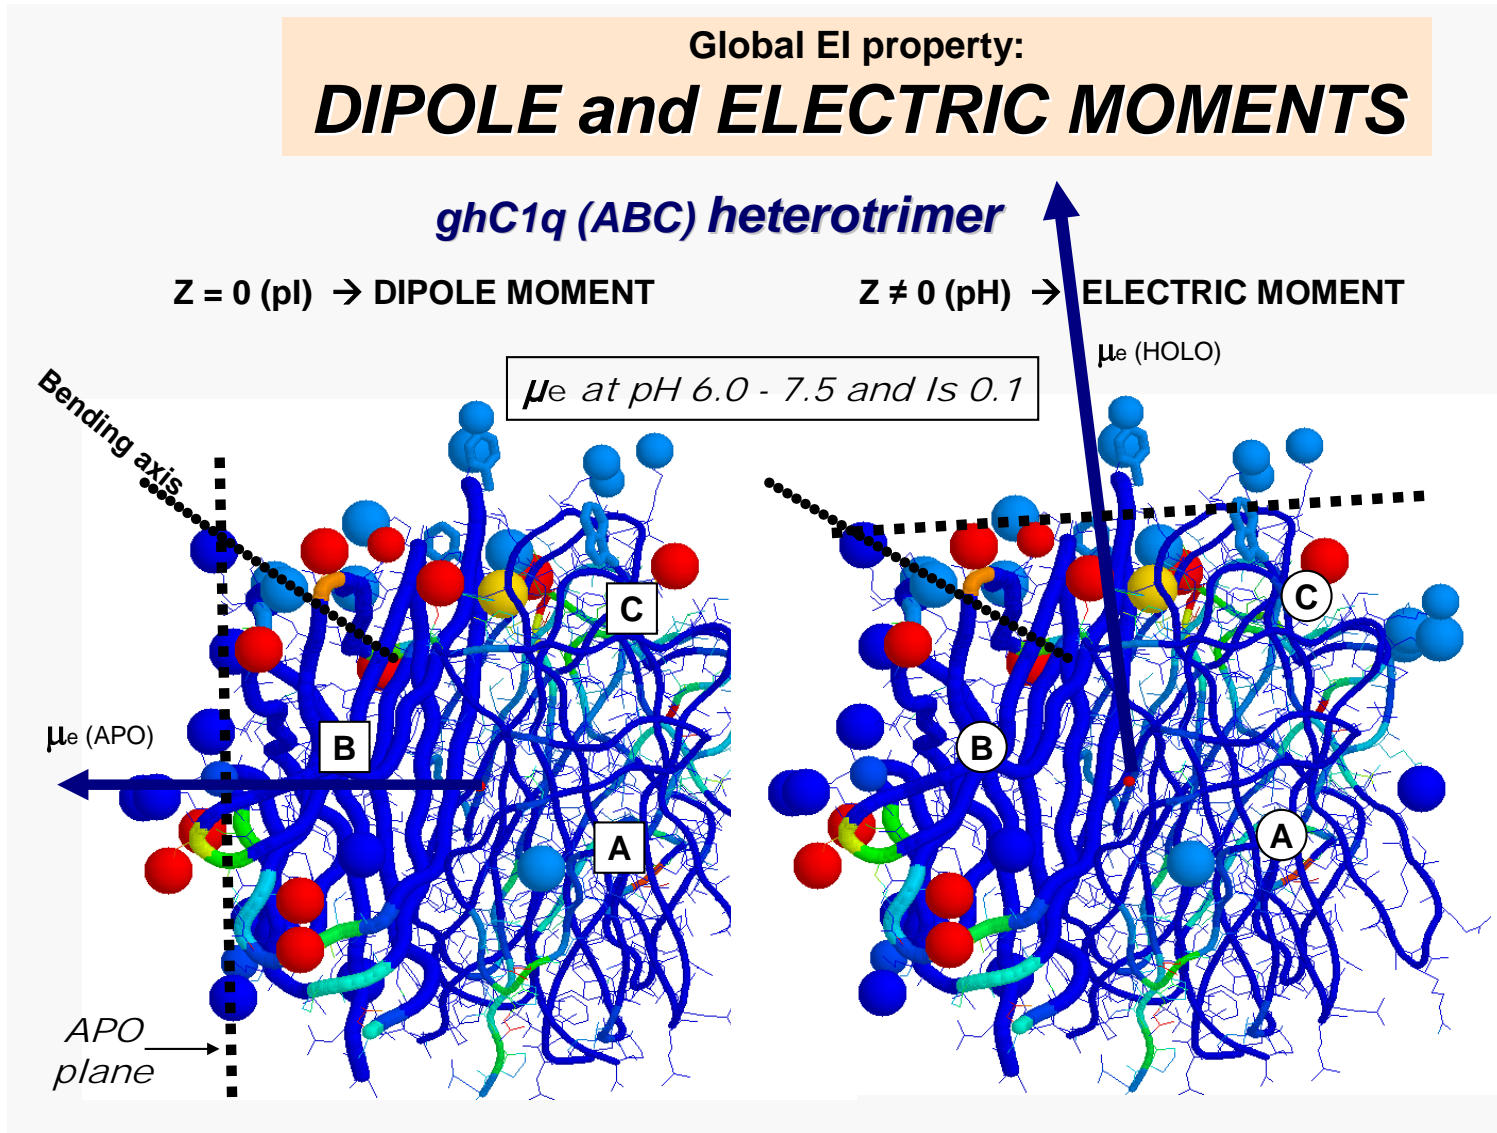



Fig. S1-5

## Direction of the electric moments in APO and HOLO forms of the B2S- C1q complex

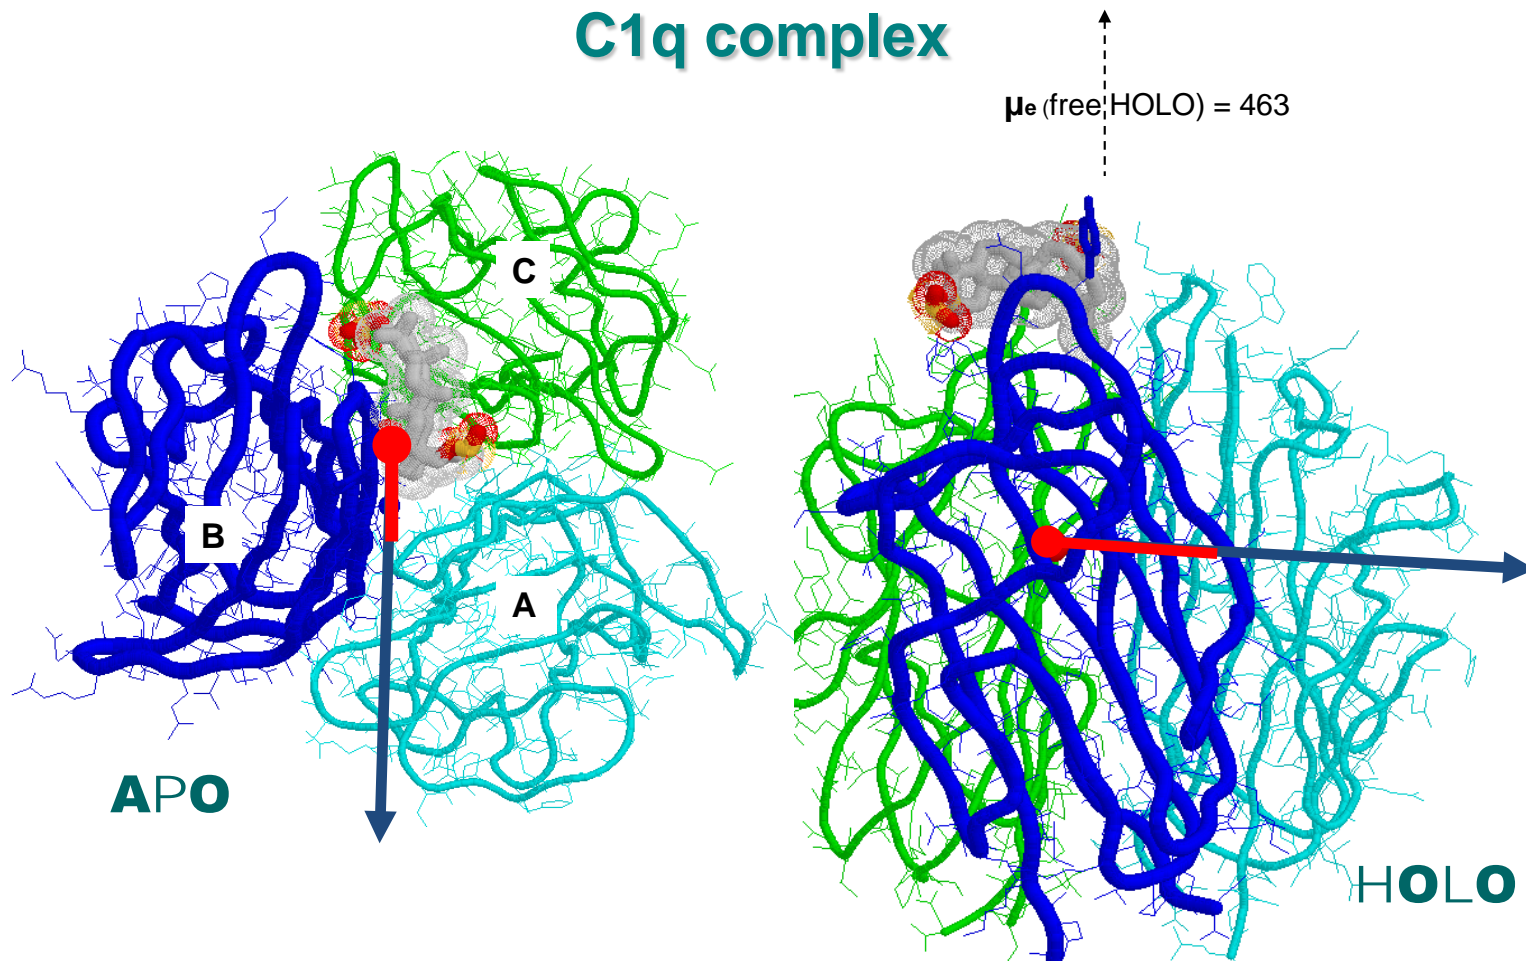

Fig. S1-6

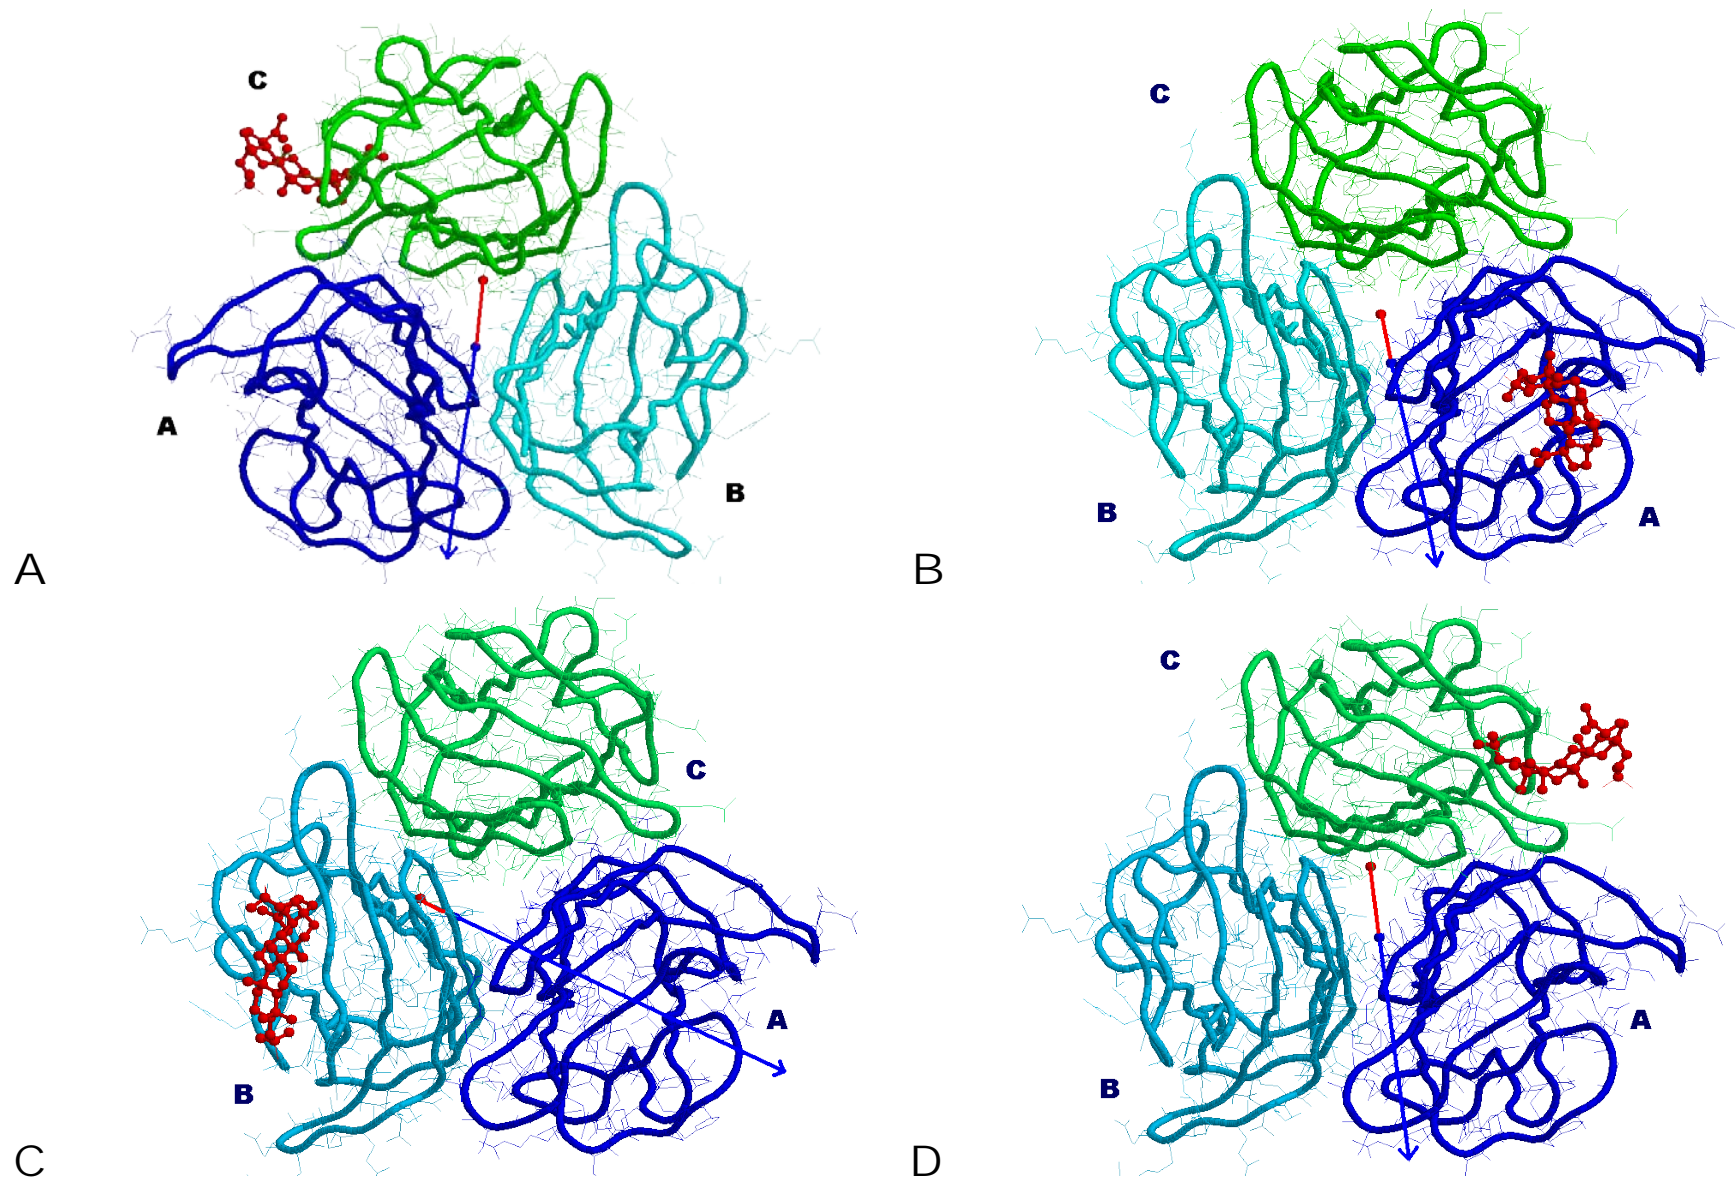

**Fig. S1-7**

C1q-C1qR putative complex- two molecules are colored by Electrostatic Potential and  $\mu_e$ -oriented

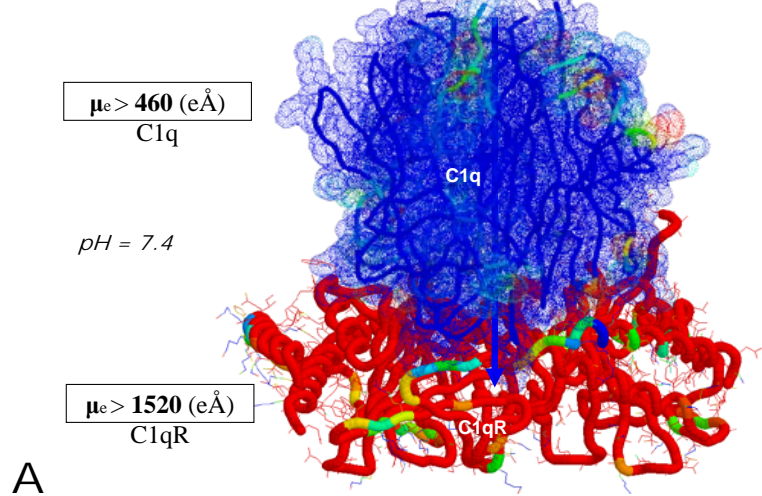

*ghC1q (trimer) and hCRP(pentamer) –*  
the natural partners of immune recognition

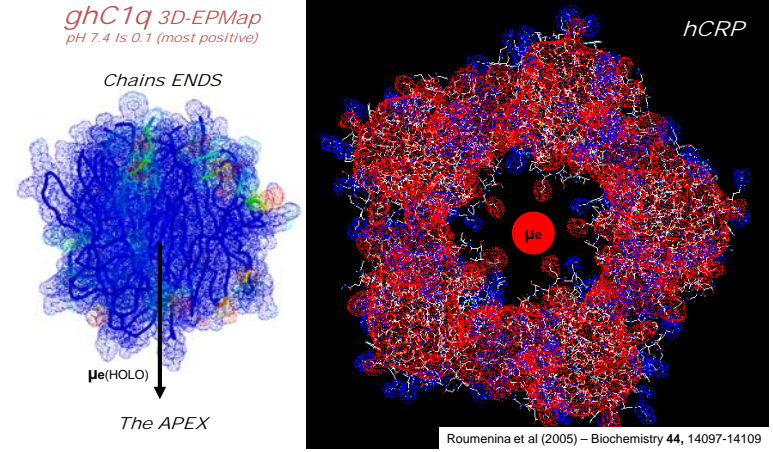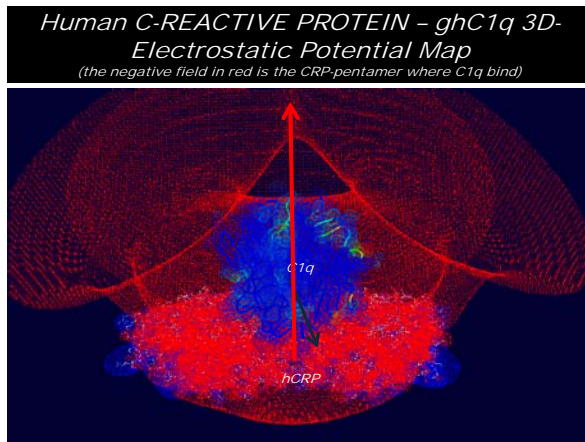

“*ghC1q* is tilted when docked into the CPR cleft” (Christine Gaboriaud)  
“Following direction of electric moment if  $Ca^{2+}$  is removed” (we add)

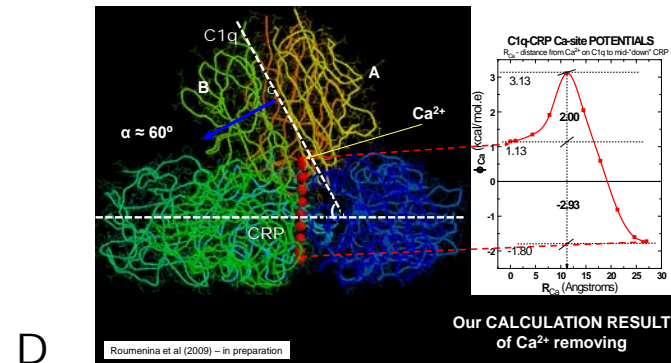



Fig. S1-8

## The **DIPOLE MOMENT**

Calculated at Dipole Moment Server <http://bioinformatics.weizmann.ac.il/cgi-bin/dipol/>  $\mu = 866 \text{ D}$

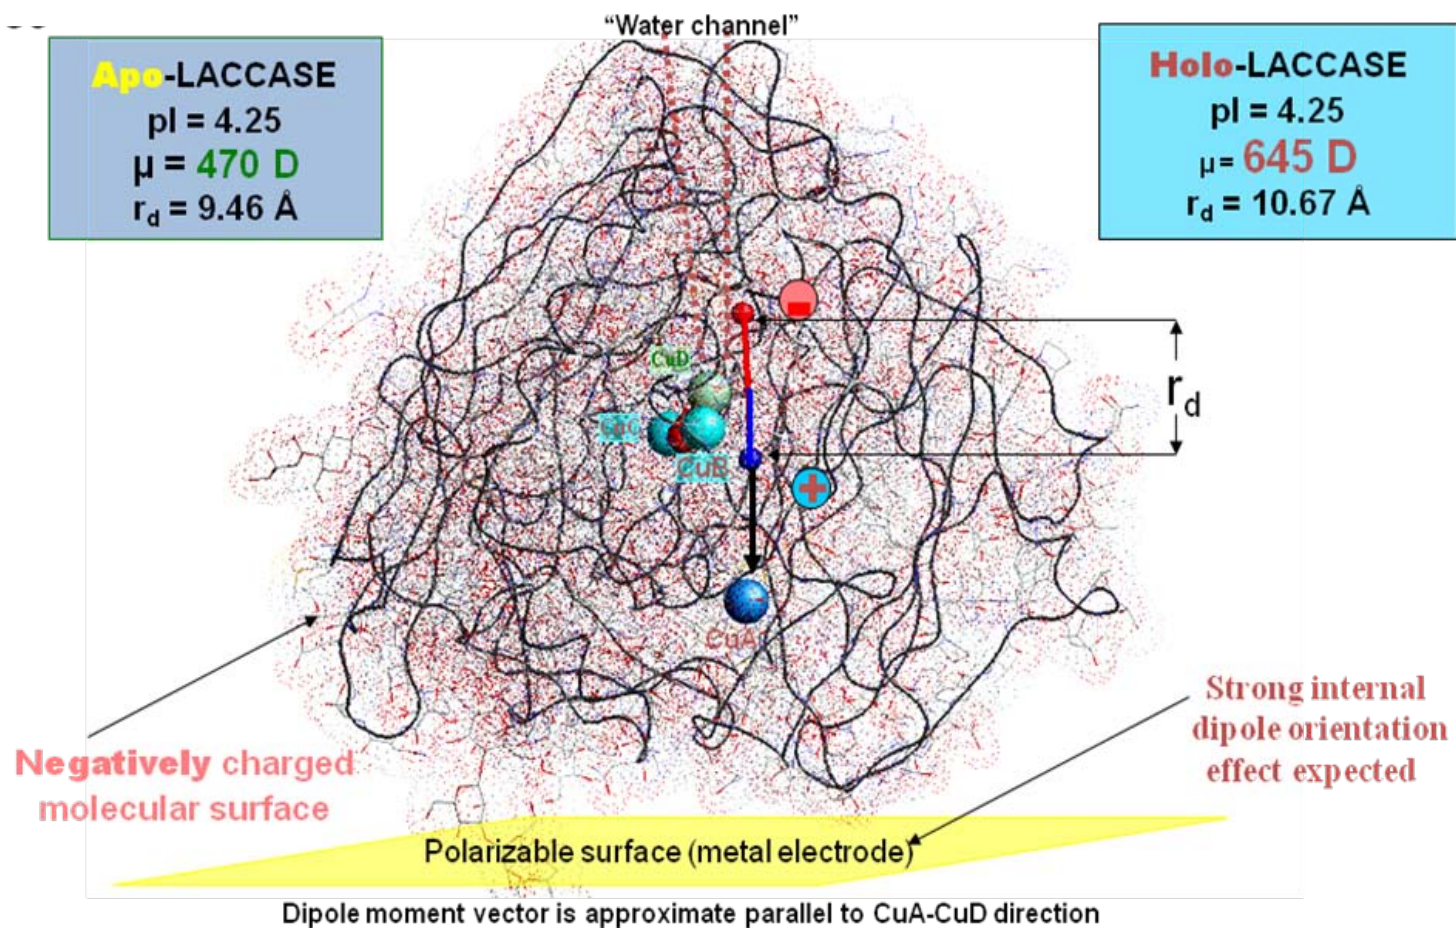



Fig. S1-9

# *ghC1q ELECTRIC MOMENTS*

*and the recognition process*

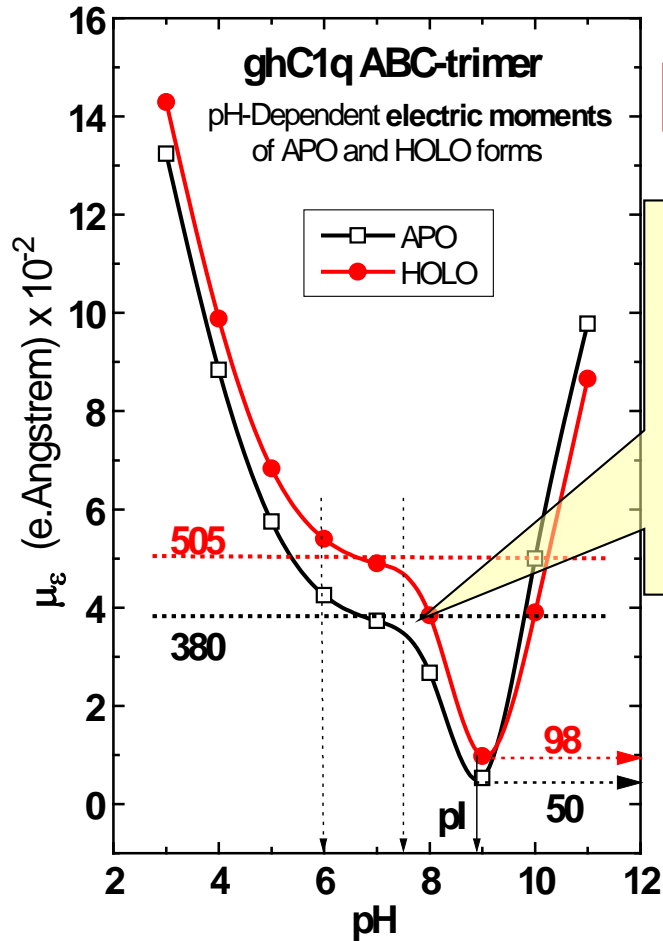

$$\Delta\mu_e(\text{HOLO-APO}) \approx 120 \text{ e}\text{\AA} \quad (\text{pH } 7.5 - 6.0)$$

- **Blood serum pH = 7.4**
  - **At inflammation pH drop with 1.0-1.5 pH**
  - **$\mu_e$  are relatively constant at pH 6-7.5**
  - **In this pH region  $\Delta\mu_e(\text{HOLO-APO})$  is also relative constant**
- =====
- FUNCTIONAL MEANING?**

*For recognition are important not only absolute values and directions of electric moments but as well as the ratio*

$\mu_e(\text{HOLO}) / \mu_e(\text{APO}) = 1.3 \pm 0.1 !$

A m(ph).org

# Cytochrome Reductase (CytBC1) B Vectors

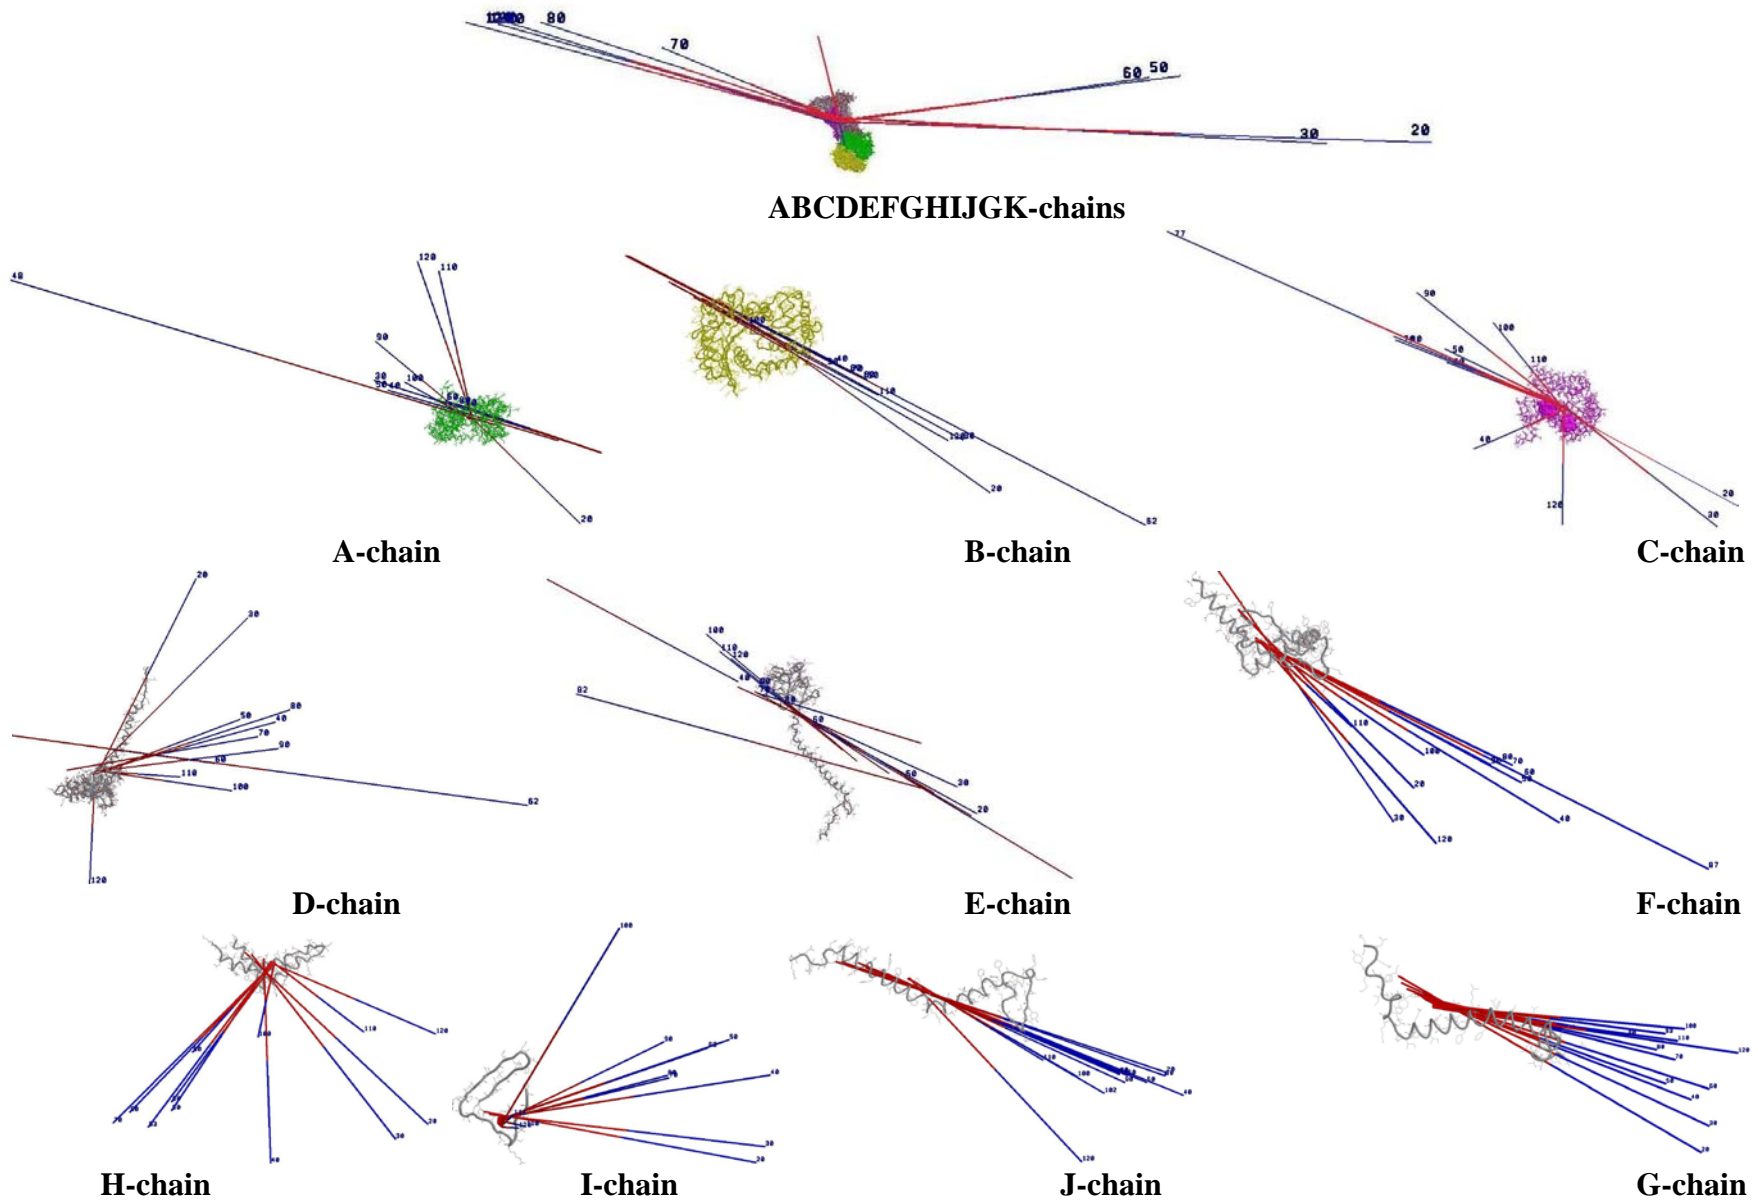

# C Scalars

## pH DEPENDENT ELECTRIC MOMENTS (scalars) of CYTOCHROME REDUCTASE

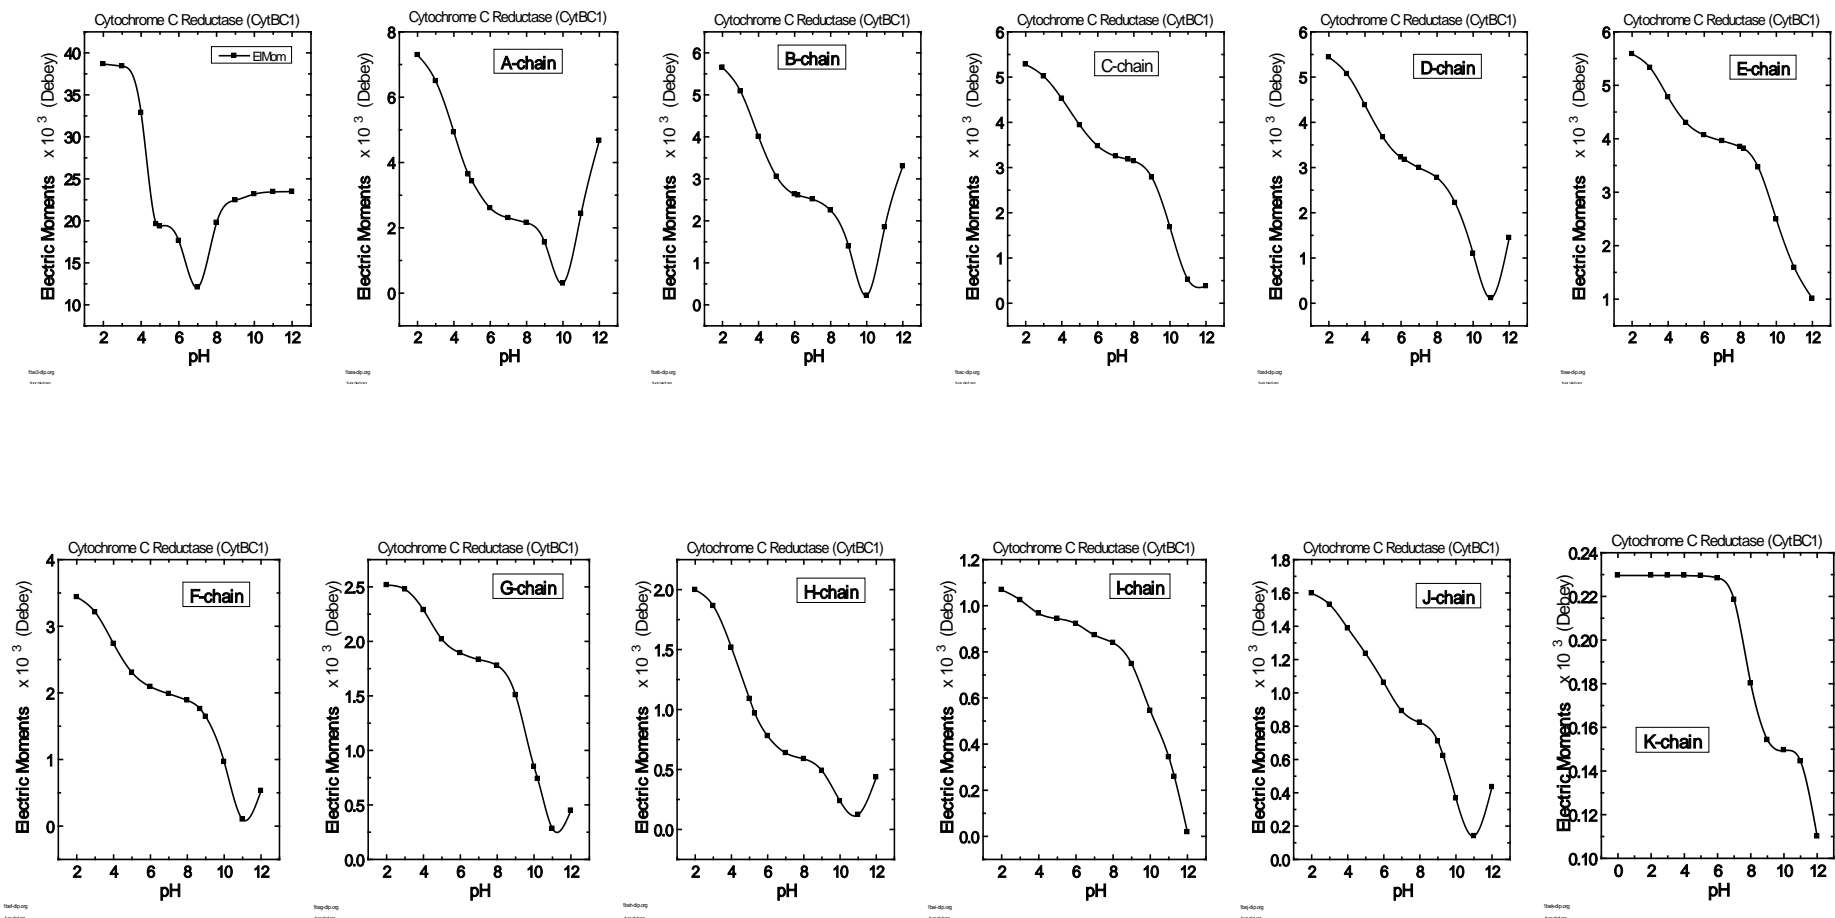



Fig. S1-9

*Global EI property:*  
**DIPOLE and ELECTRIC MOMENTS**

**TEM1  $\beta$ -lactamase reaction cycle intermediates (RI)**

| No | CYCLE<br>RI | Electric moments ( $\mu_e$ )<br>at pH |              |              | Dipole moments ( $\mu_d$ ) at pl<br>(in Debye) (e.Å) |                 |                           |
|----|-------------|---------------------------------------|--------------|--------------|------------------------------------------------------|-----------------|---------------------------|
|    |             | 4.0<br>(e.Å)                          | 6.5<br>(e.Å) | 9.0<br>(e.Å) | $pI/\Delta G_{el}$<br>(kcal/mol)                     | Distance<br>(Å) | Dipole<br>moment<br>(e.Å) |
| 1. | FE          | <b>531</b>                            | <b>254</b>   | <b>388</b>   | 5.25 / -17.46                                        | 3.35            | <b>49</b>                 |
| 2. | MC          | <b>413</b>                            | <b>379</b>   | <b>556</b>   | 5.25 / -19.5                                         | 2.76            | <b>105</b>                |
| 3. | T1          | <b>486</b>                            | <b>344</b>   | <b>514</b>   | 5.25 / -17.9                                         | 3.13            | <b>59</b>                 |
| 4. | AE          | <b>614</b>                            | <b>184</b>   | <b>342</b>   | 5.75 / -19.8                                         | 3.44            | <b>45</b>                 |
| 5. | T2          | <b>614</b>                            | <b>185</b>   | <b>357</b>   | 5.75 / -19.8                                         | 3.52            | <b>46</b>                 |
| 6. | PE          | <b>514</b>                            | <b>298</b>   | <b>457</b>   | 5.25 / -22.7                                         | 3.00            | <b>30</b>                 |

Fig. S1-10 A

### 3D-Electrostatic Potential Mapping

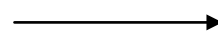

FORCES

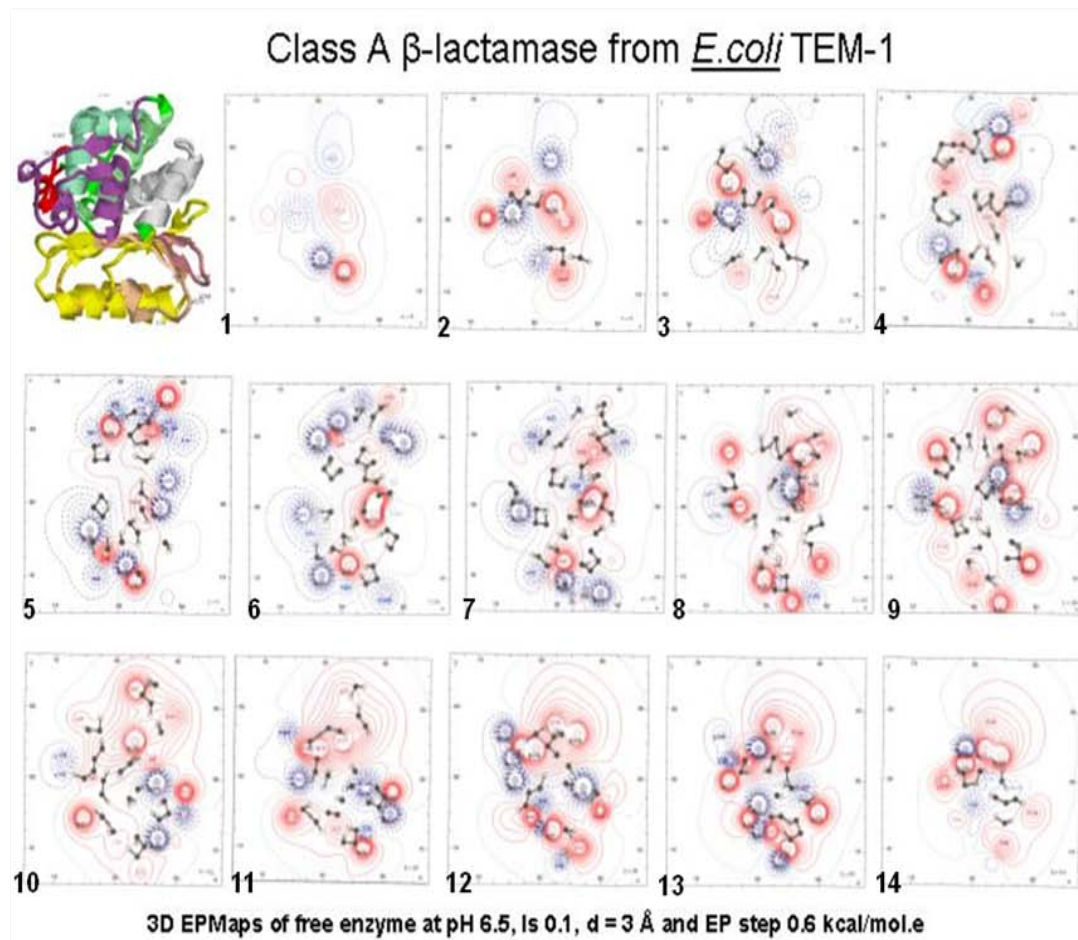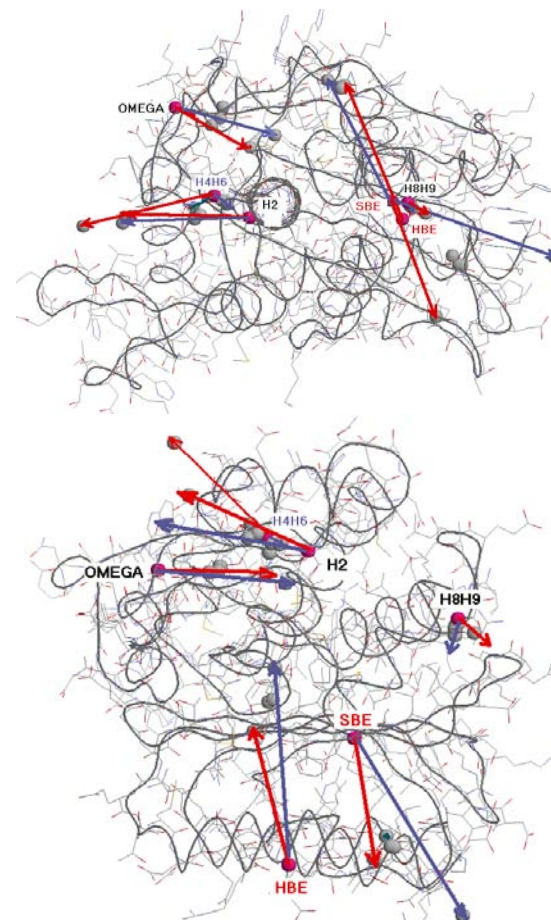

Fig. S1-10 B

# 3D-ELECTROSTATIC POTENTIAL GRADIENS (FORCES)

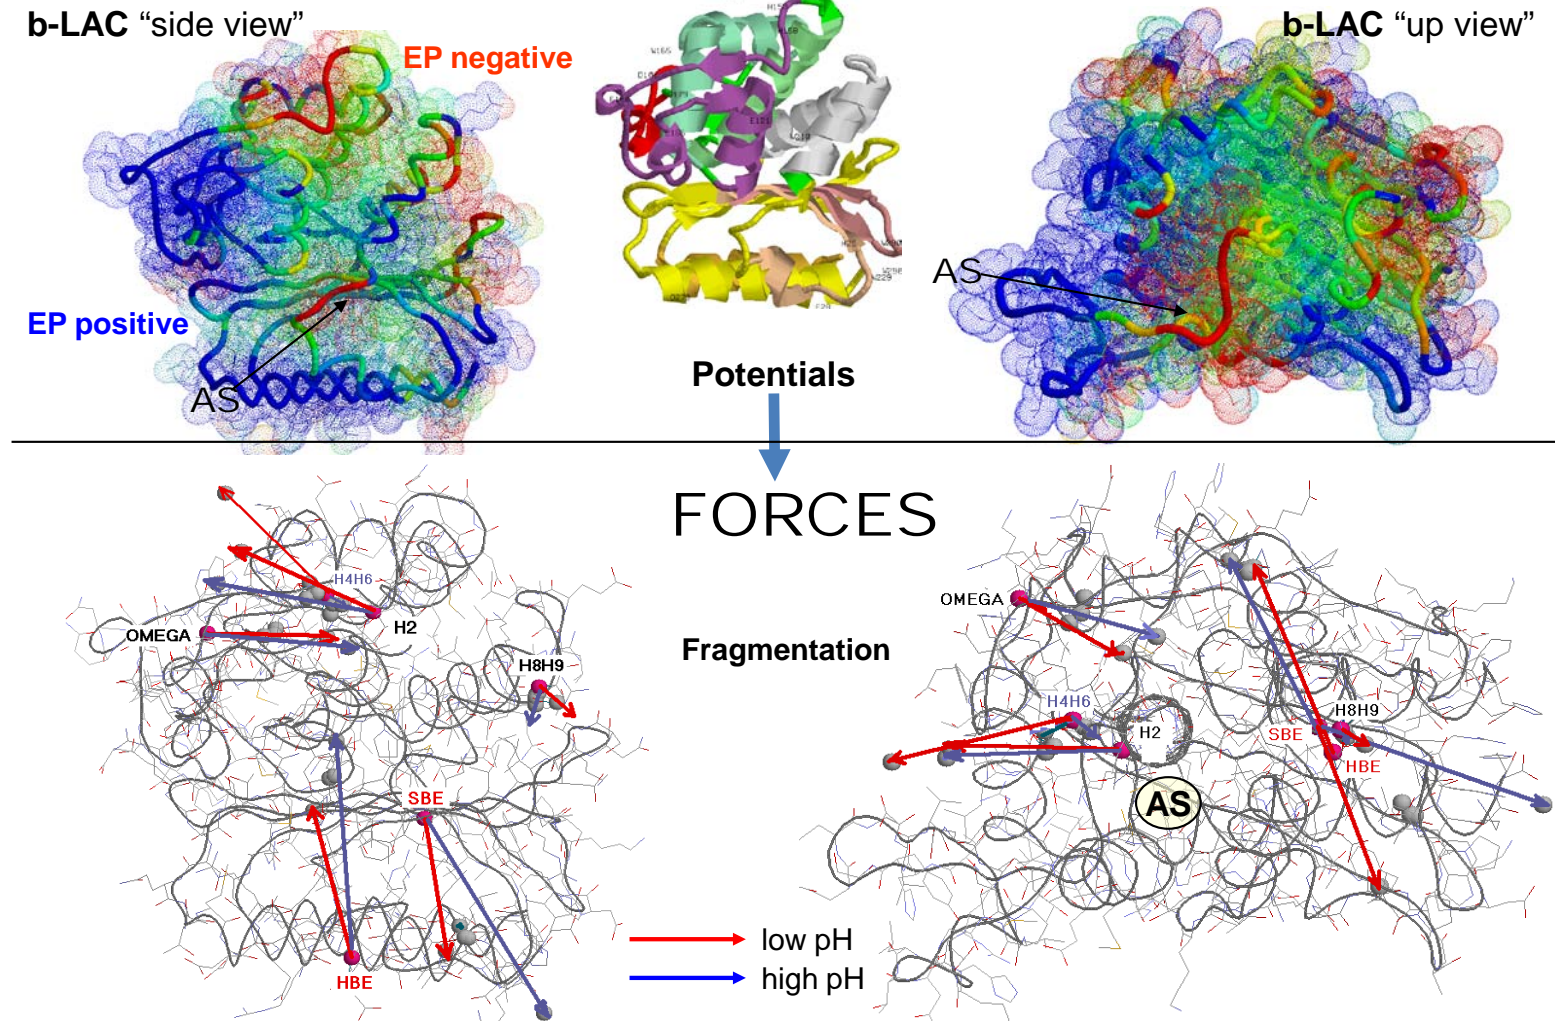



Fig. S1-11

A

**“Computer Mutagenesis”**  
Electrostatic Interaction Analysis

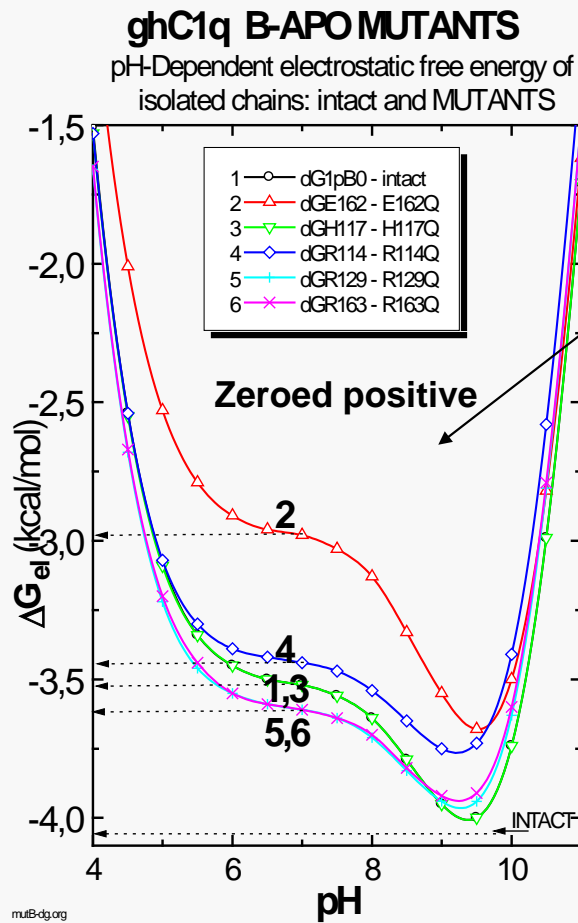

Manual plots like that

Difference plots by:

- $\Delta S_i$
- $\Delta Z_i$
- $\Delta pK_{a,i}$
- $\Delta E_{el}$
- $\delta \Delta G_{el,i}$
- $\Delta \varphi_{el,i}$

**Semi-automatic fast screening**

$$\delta \Delta G_{el} = \Delta G_{el,mut} - \Delta G_{el,intact}$$

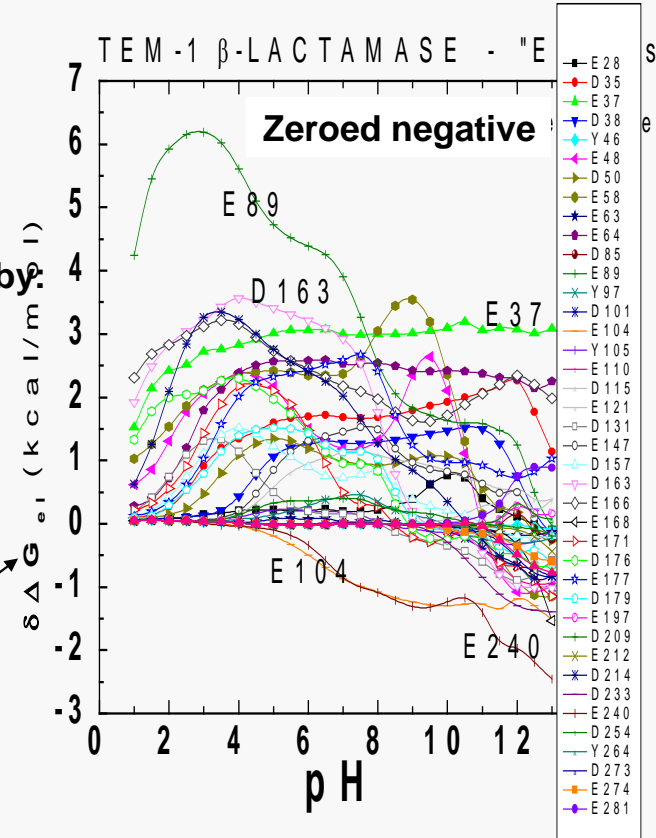

Fig. S1-11

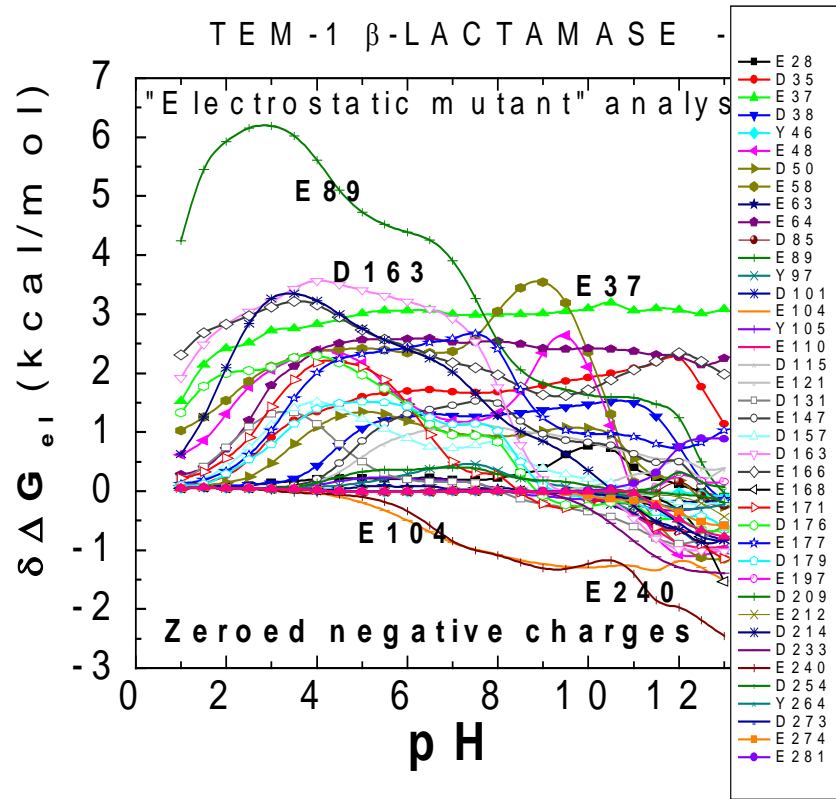

B

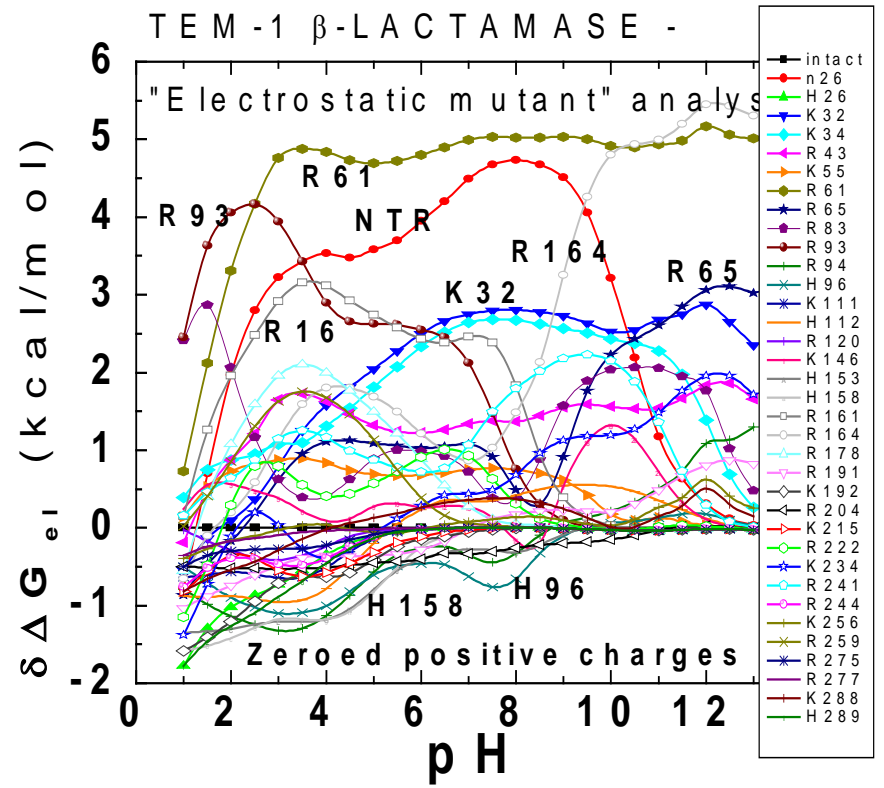

C

FINE
